# MIND TO MIND

Creative writing that explores the abstract side of our profession and our lives

*Stephen T. Harvey, M.D., Editor*

## The Haunting Revenant

Kathryn Elizabeth McGoldrick, M.D., F.C.A.I.(Hon)

**B**ecause you were discovered in time,  
Clotho, Lachesis, and Atropos regrouped.  
Back from rehab, your travail continues.  
A skein of glances looms the story  
as you navigate the hospital corridors.  
The past surges and eddies through the present,  
with a logic, texture, and tenacity of its own.  
Uncomfortable and remote, colleagues  
remember the lies, all the lies....  
The tensile strength of that rebarbative web endures.  
Silence hangs heavy like musty tapestry.  
Overlooking pathognomonic signs,  
we were complicit in denial.  
Suspensions, slight as dandelions, became puffballs,  
dispersed on a gentle breeze.  
Until we forgive ourselves, we cannot forgive you.

Accepted for publication August 19, 2021. Published online first on October 5, 2021. From the Department of Anesthesiology, New York Medical College, Valhalla, New York. kathryn\_mcgoldrick@nymc.edu.

Permission to reprint granted to the American Society of Anesthesiologists by copyright author/owner. Anesthesiology 2022; 136:513–4. DOI: 10.1097/ALN.0000000000003981

“Gifts of imperfection,” an oxymoron  
puzzling to physicians, morph into recognition of,  
if not empathy for, your suffering.  
Gradually.

A graphic reminder of our vulnerability, so finely threaded,  
you bear witness to stark and savage reality.  
Wearing a darkness both sooty and soft,  
lofty aspirations become straitjackets  
until we can acknowledge that  
doctors get sick, too.
